# Supplementary material
Source: publisher site journal article supplement (https://www.dovepress.com/article/492456)

**Supplementary Figure 1** Changes in partial carbon dioxide pressure (*P*aCO2) at T0-T4 during surgery. T0: Before preoxygenation. T1: 30 min after pneumoperitoneum. T2: 60 min after pneumoperitoneum. T3: 90 min after pneumoperitoneum. T4: Before deflation. Compared with the normocapnia group, *P*aCO2 was significantly higher from T1 to T4 in the permissive hypercapnia group (*****P* < 0.0001, the Mann–Whitney U-test).


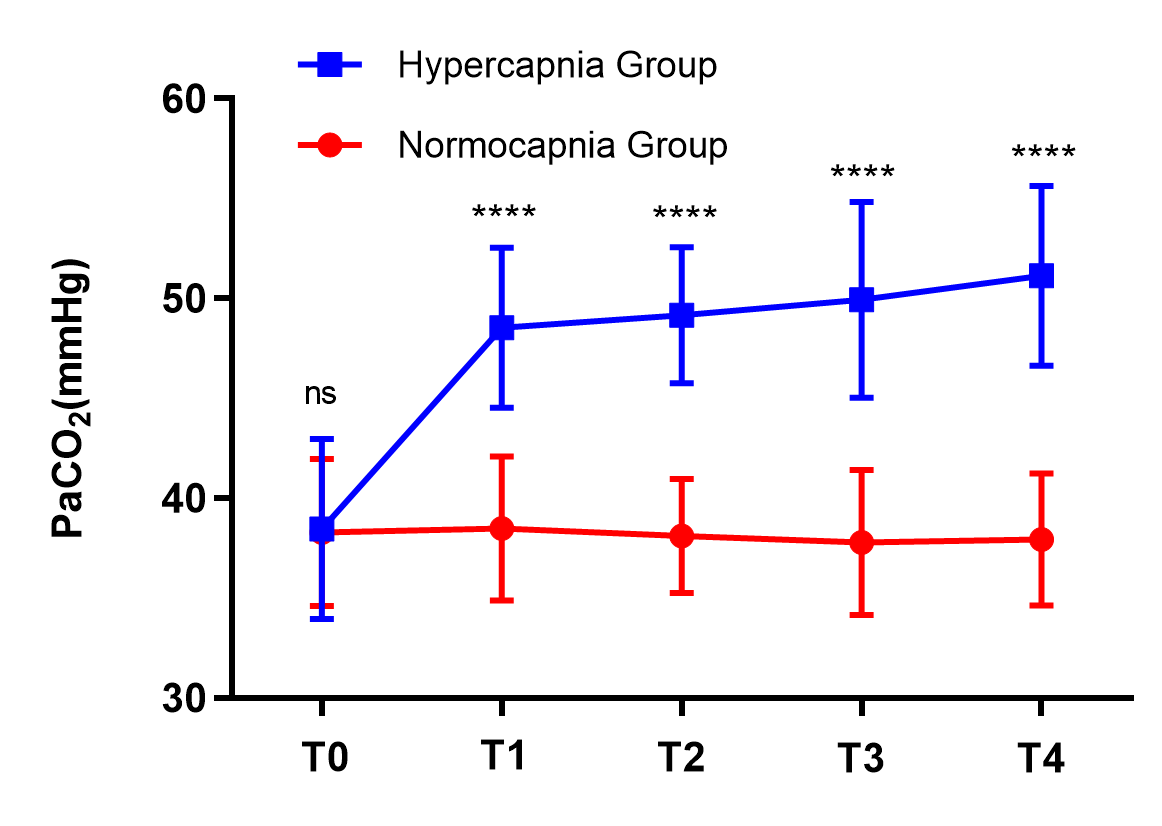


**Supplementary Figure 2** Changes in regional cerebral oxygen saturation (rSO2) at T0-T4 during surgery. T0: Before preoxygenation. T1: 30 min after pneumoperitoneum. T2: 60 min after pneumoperitoneum. T3: 90 min after pneumoperitoneum. T4: Before deflation. Compared with the normocapnia group, rSO2 was significantly higher from T2 to T4 in the permissive hypercapnia group (**P* <0.05 ****P*<0.001, the Mann–Whitney U-test).


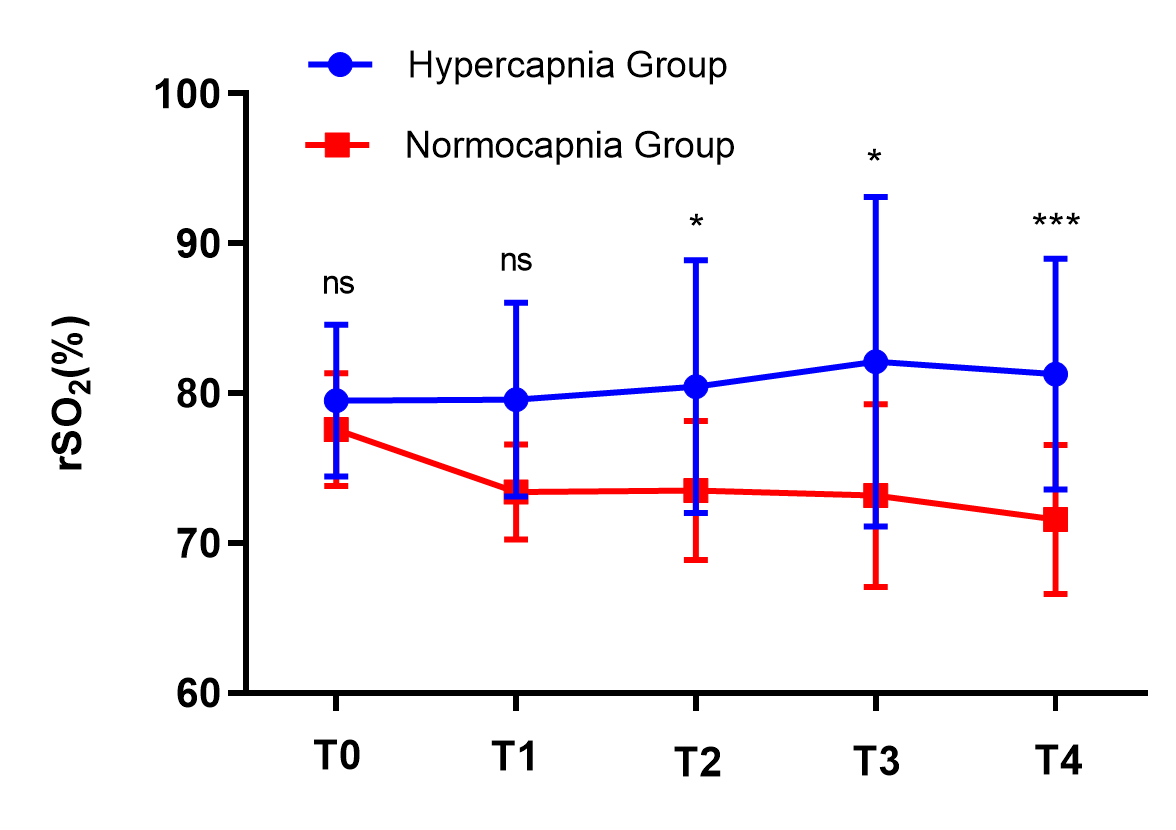

Supplement: Supplementary file 1 [file get_supplementary_file.php]
